# Supplementary material
Source: publisher site journal article supplement (https://www.dovepress.com/article/441251)
Supplement: Supplementary file 1 [file get_supplementary_file.php]

**Table S1. The top 20 DEmRNAs in OWF vs HC**

| **Gene** | **log2 Fold Change** | **P-value** | **P-adj** | **Up/Down** |
| --- | --- | --- | --- | --- |
| ENSG00000258659.6 | -1.986644701 | 1.82E-16 | 3.46E-12 | Down |
| ENSG00000103342.13 | -1.106238102 | 6.73E-13 | 6.39E-09 | Down |
| ENSG00000132256.19 | -1.983927952 | 1.19E-12 | 7.51E-09 | Down |
| ENSG00000232381.1 | -3.378870941 | 2.46E-11 | 1.17E-07 | Down |
| ENSG00000229988.2 | -3.989859691 | 6.01E-11 | 2.28E-07 | Down |
| ENSG00000121236.21 | -3.792740115 | 1.04E-10 | 3.29E-07 | Down |
| ENSG00000100225.18 | -1.254932657 | 1.26E-10 | 3.38E-07 | Down |
| ENSG00000249633.1 | -3.979464388 | 1.42E-10 | 3.38E-07 | Down |
| ENSG00000181616.9 | -4.014291824 | 2.15E-09 | 4.54E-06 | Down |
| ENSG00000145335.17 | -1.235923308 | 2.53E-09 | 4.81E-06 | Down |
| ENSG00000242612.7 | 8.623752219 | 1.24E-06 | 0.001311443 | Up |
| ENSG00000120217.14 | 1.387522826 | 0.000176047 | 0.079527239 | Up |
| ENSG00000269378.1 | 1.014475948 | 0.000245176 | 0.098972679 | Up |
| ENSG00000165730.16 | 2.93457627 | 0.000466937 | 0.164059156 | Up |
| ENSG00000103202.13 | 4.874870902 | 0.000555372 | 0.184860826 | Up |
| ENSG00000074803.20 | 4.415330603 | 0.000683709 | 0.212656064 | Up |
| ENSG00000120645.12 | 3.90230968 | 0.000716288 | 0.219195581 | Up |
| ENSG00000262209.3 | 1.325894726 | 0.001068787 | 0.285606955 | Up |
| ENSG00000253305.2 | 1.114534007 | 0.001141006 | 0.295682588 | Up |
| ENSG00000074660.16 | 1.309968106 | 0.001357025 | 0.322491172 | Up |

**Table S2. The top 20 DEmRNAs in** **OVF vs HC**

| **Gene** | **log2 Fold Change** | **P-value** | **P-adj** | **Up/Down** |
| --- | --- | --- | --- | --- |
| ENSG00000180509.12 | -1.92796 | 9.40E-09 | 0.000159185 | Down |
| ENSG00000162399.9 | -3.13593 | 2.36E-08 | 0.00019849 | Down |
| ENSG00000188056.12 | -2.92273 | 3.52E-08 | 0.00019849 | Down |
| ENSG00000228278.4 | -1.4221 | 6.68E-08 | 0.000263465 | Down |
| ENSG00000118520.15 | -3.51138 | 7.78E-08 | 0.000263465 | Down |
| ENSG00000123836.15 | -2.61386 | 1.84E-07 | 0.000425376 | Down |
| ENSG00000092758.18 | -1.27878 | 2.42E-07 | 0.000425376 | Down |
| ENSG00000121270.15 | -4.47667 | 2.49E-07 | 0.000425376 | Down |
| ENSG00000205085.12 | -1.16667 | 2.76E-07 | 0.000425376 | Down |
| ENSG00000218749.1 | -2.14262 | 7.00E-07 | 0.000808447 | Down |
| ENSG00000175279.22 | 3.864234 | 6.78E-08 | NA | Up |
| ENSG00000106565.18 | 2.039213 | 1.45E-07 | 0.000409205 | Up |
| ENSG00000120217.14 | 1.644392 | 2.61E-07 | 0.000425376 | Up |
| ENSG00000188290.11 | 2.513074 | 1.39E-06 | 0.001380283 | Up |
| ENSG00000002933.9 | 1.914618 | 4.22E-06 | 0.002537899 | Up |
| ENSG00000162772.17 | 1.892389 | 5.06E-06 | 0.002676077 | Up |
| ENSG00000185875.13 | 1.314917 | 9.15E-06 | 0.004187696 | Up |
| ENSG00000074660.16 | 1.422482 | 2.06E-05 | 0.006976193 | Up |
| ENSG00000138166.6 | 1.274504 | 3.12E-05 | 0.008814655 | Up |
| ENSG00000211664.3 | 3.352038 | 5.59E-05 | 0.014424479 | Up |

**Table S3. The top 20 DEmRNAs in OVF vs OWF**

| **Gene** | **log2 Fold Change** | **P-value** | **P-adj** | **Up/Down** |
| --- | --- | --- | --- | --- |
| ENSG00000242612.7 | -8.55076 | 4.24E-09 | 4.46E-05 | Down |
| ENSG00000188056.12 | -2.21023 | 1.11E-08 | 5.86E-05 | Down |
| ENSG00000103723.15 | -2.9906 | 4.82E-07 | 0.002027 | Down |
| ENSG00000135424.18 | -2.88501 | 1.06E-06 | 0.003181 | Down |
| ENSG00000184106.8 | -1.84156 | 1.39E-06 | 0.003653 | Down |
| ENSG00000121270.15 | -3.68475 | 1.79E-06 | 0.004177 | Down |
| ENSG00000106070.20 | -3.10071 | 2.62E-06 | 0.005514 | Down |
| ENSG00000163958.14 | -4.61314 | 3.44E-06 | 0.006576 | Down |
| ENSG00000174885.12 | -1.13697 | 5.39E-06 | 0.008725 | Down |
| ENSG00000225690.1 | -1.27855 | 1.18E-05 | 0.016579 | Down |
| ENSG00000160191.18 | 2.252642 | 1.42E-11 | 2.99E-07 | Up |
| ENSG00000211638.2 | 2.681128 | 1.11E-08 | 5.86E-05 | Up |
| ENSG00000224877.4 | 1.080523 | 4.23E-06 | 0.007418 | Up |
| ENSG00000284671.1 | 1.621696 | 7.32E-06 | 0.011005 | Up |
| ENSG00000013573.17 | 1.702288 | 2.20E-05 | 0.027276 | Up |
| ENSG00000213205.3 | 2.321268 | 2.54E-05 | 0.028115 | Up |
| ENSG00000165949.12 | 5.175893 | 4.29E-05 | 0.037623 | Up |
| ENSG00000229988.2 | 3.521041 | 5.70E-05 | 0.043094 | Up |
| ENSG00000189283.10 | 1.949242 | 6.17E-05 | 0.043288 | Up |
| ENSG00000095932.7 | 1.624717 | 0.000164461 | 0.078635 | Up |

**Table S4. The top 20 DElncRNAs in** **OWF vs HC**

| **Gene** | **log2 Fold Change** | **P-value** | **P-adj** | **Up/Down** |
| --- | --- | --- | --- | --- |
| ENSG00000189316.3 | -2.21124 | 0.000769 | 0.653273 | Down |
| ENSG00000224481.3 | -3.21312 | 0.000135 | 0.27586 | Down |
| ENSG00000246228.6 | -2.17072 | 0.000124 | 0.27586 | Down |
| ENSG00000249790.3 | -2.43286 | 4.20E-06 | 0.028795 | Down |
| ENSG00000251095.7 | -1.20449 | 0.00052 | 0.527356 | Down |
| ENSG00000262413.1 | -1.86417 | 0.000261 | 0.358264 | Down |
| ENSG00000267506.5 | -1.45456 | 0.002173 | 0.999944 | Down |
| ENSG00000272491.1 | -2.14938 | 0.00156 | 0.972425 | Down |
| ENSG00000272821.1 | -2.7364 | 0.00183 | 0.999944 | Down |
| ENSG00000287670.1 | -1.06047 | 0.000858 | 0.653273 | Down |
| ENSG00000230490.3 | 2.534627 | 0.00356 | 0.999944 | Up |
| ENSG00000230730.1 | 2.139015 | 0.004545 | 0.999944 | Up |
| ENSG00000233896.2 | 1.46114 | 0.002772 | 0.999944 | Up |
| ENSG00000249275.1 | 2.40444 | 0.003112 | 0.999944 | Up |
| ENSG00000255998.2 | 3.034152 | 0.000161 | 0.27586 | Up |
| ENSG00000261269.1 | 2.321909 | 0.005268 | 0.999944 | Up |
| ENSG00000266978.1 | 3.050268 | 0.000538 | 0.527356 | Up |
| ENSG00000274987.1 | 1.291595 | 0.001261 | 0.8646 | Up |
| ENSG00000287286.1 | 1.405736 | 0.006783 | 0.999944 | Up |

**Table S5. The top 20 DElncRNAs in OVF vs HC**

| **Gene** | **log2 Fold Change** | **P-value** | **P-adj** | **Up/Down** |
| --- | --- | --- | --- | --- |
| ENSG00000281969.1 | -4.55666242 | 4.89E-12 | 2.90E-08 | Down |
| ENSG00000278338.4 | -4.88846243 | 2.55E-09 | 7.54E-06 | Down |
| ENSG00000280279.1 | -1.28135682 | 6.10E-07 | 0.00120354 | Down |
| ENSG00000287458.1 | -1.81368445 | 2.69E-06 | 0.003958384 | Down |
| ENSG00000250765.6 | -1.47872768 | 3.34E-06 | 0.003958384 | Down |
| ENSG00000267339.7 | -2.13727429 | 4.80E-06 | 0.004097636 | Down |
| ENSG00000236525.1 | -1.80027342 | 4.85E-06 | 0.004097636 | Down |
| ENSG00000235033.7 | -4.60757826 | 6.44E-06 | 0.004768121 | Down |
| ENSG00000258831.1 | -3.00667159 | 8.99E-06 | 0.005914943 | Down |
| ENSG00000231527.7 | -1.55316634 | 1.80E-05 | 0.010329124 | Down |
| ENSG00000280348.1 | 1.561476153 | 4.14E-05 | 0.013584829 | Up |
| ENSG00000244998.1 | 1.243044039 | 4.59E-05 | 0.013584829 | Up |
| ENSG00000272512.1 | 2.519228522 | 8.52E-05 | 0.021917005 | Up |
| ENSG00000255998.2 | 3.099783317 | 0.000107598 | 0.025475001 | Up |
| ENSG00000274767.1 | 1.2074451 | 0.000240283 | 0.041830501 | Up |
| ENSG00000261754.2 | 1.450376669 | 0.000266133 | 0.043960629 | Up |
| ENSG00000259349.2 | 1.869171163 | 0.000354273 | 0.052423487 | Up |
| ENSG00000231769.3 | 1.835013625 | 0.000419129 | 0.06050785 | Up |
| ENSG00000228549.4 | 2.038323553 | 0.000471437 | 0.065455046 | Up |
| ENSG00000285732.1 | 1.89693849 | 0.000597455 | 0.072289716 | Up |

**Table S6. The top 20 DElncRNAs in OVF vs OWF**

| **Gene** | **log2 Fold Change** | **P-value** | **P-adj** | **Up/Down** |
| --- | --- | --- | --- | --- |
| ENSG00000278338.4 | -5.37364 | 9.91E-07 | 0.00613787 | Down |
| ENSG00000233896.2 | -1.871 | 2.51E-05 | 0.05418152 | Down |
| ENSG00000204528.3 | -1.45718 | 3.14E-05 | 0.05418152 | Down |
| ENSG00000229124.7 | -1.54132 | 3.50E-05 | 0.05418152 | Down |
| ENSG00000233077.1 | -1.89743 | 6.12E-05 | 0.07586941 | Down |
| ENSG00000261019.1 | -1.35669 | 9.65E-05 | 0.08285383 | Down |
| ENSG00000287733.1 | -1.22853 | 0.00011333 | 0.08285383 | Down |
| ENSG00000203999.9 | -1.64645 | 0.00011501 | 0.08285383 | Down |
| ENSG00000286658.1 | -2.68648 | 0.00012283 | 0.08285383 | Down |
| ENSG00000235033.7 | -4.42548 | 0.00015027 | 0.08285383 | Down |
| ENSG00000213468.7 | 1.095315 | 0.00016603 | 0.08285383 | Up |
| ENSG00000232827.3 | 1.966584 | 0.00029962 | 0.08644533 | Up |
| ENSG00000287475.1 | 1.751574 | 0.00030423 | 0.08644533 | Up |
| ENSG00000227218.7 | 1.367379 | 0.00053571 | 0.1144388 | Up |
| ENSG00000286055.1 | 2.80888 | 0.00072496 | 0.12846791 | Up |
| ENSG00000249790.3 | 1.831952 | 0.00107565 | 0.16252804 | Up |
| ENSG00000260381.2 | 2.374531 | 0.00122856 | NA | Up |
| ENSG00000279251.1 | 1.767881 | 0.00134404 | 0.18100748 | Up |
| ENSG00000253982.2 | 1.440827 | 0.00142515 | 0.1833846 | Up |
| ENSG00000261434.1 | 2.86026 | 0.00143674 | NA | Up |
